# Supplementary material
Source: Springer Nature journal article supplement (https://www.springermedizin.de/resource/supplementary/13000_2013_715_MOESM3_ESM.pdf/9625334)

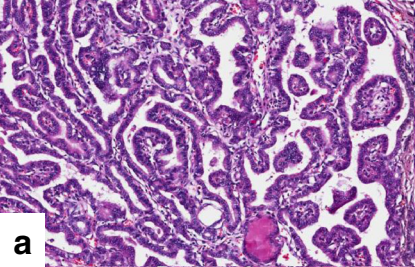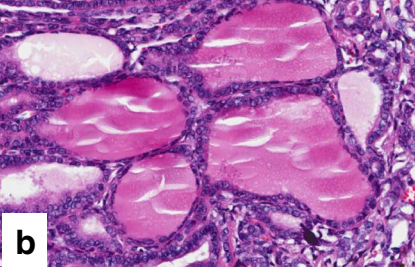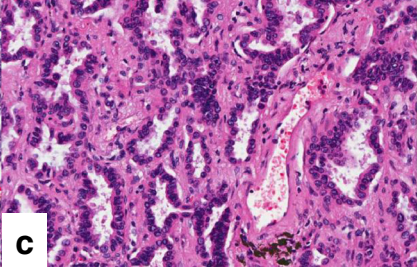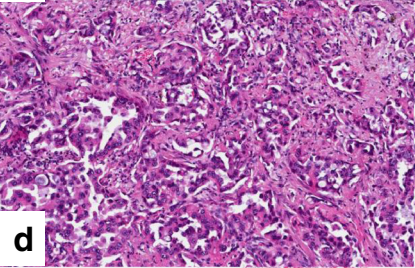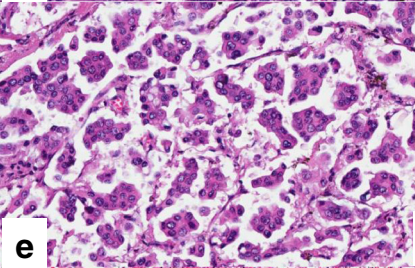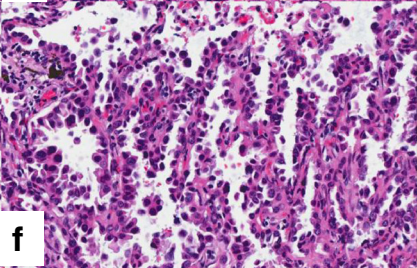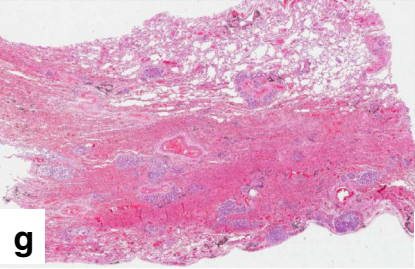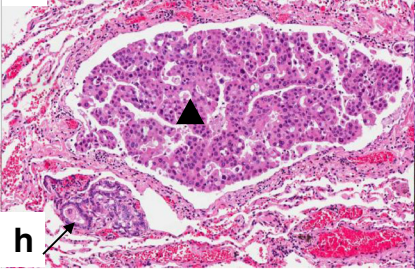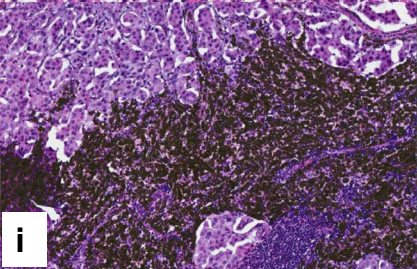

Supplement: MOESM3 [file 9625334]
